# Supplementary material
Source: publisher site journal article supplement (https://www.dovepress.com/article/325629)
Supplement: Supplementary file 1 [file get_supplementary_file.php]

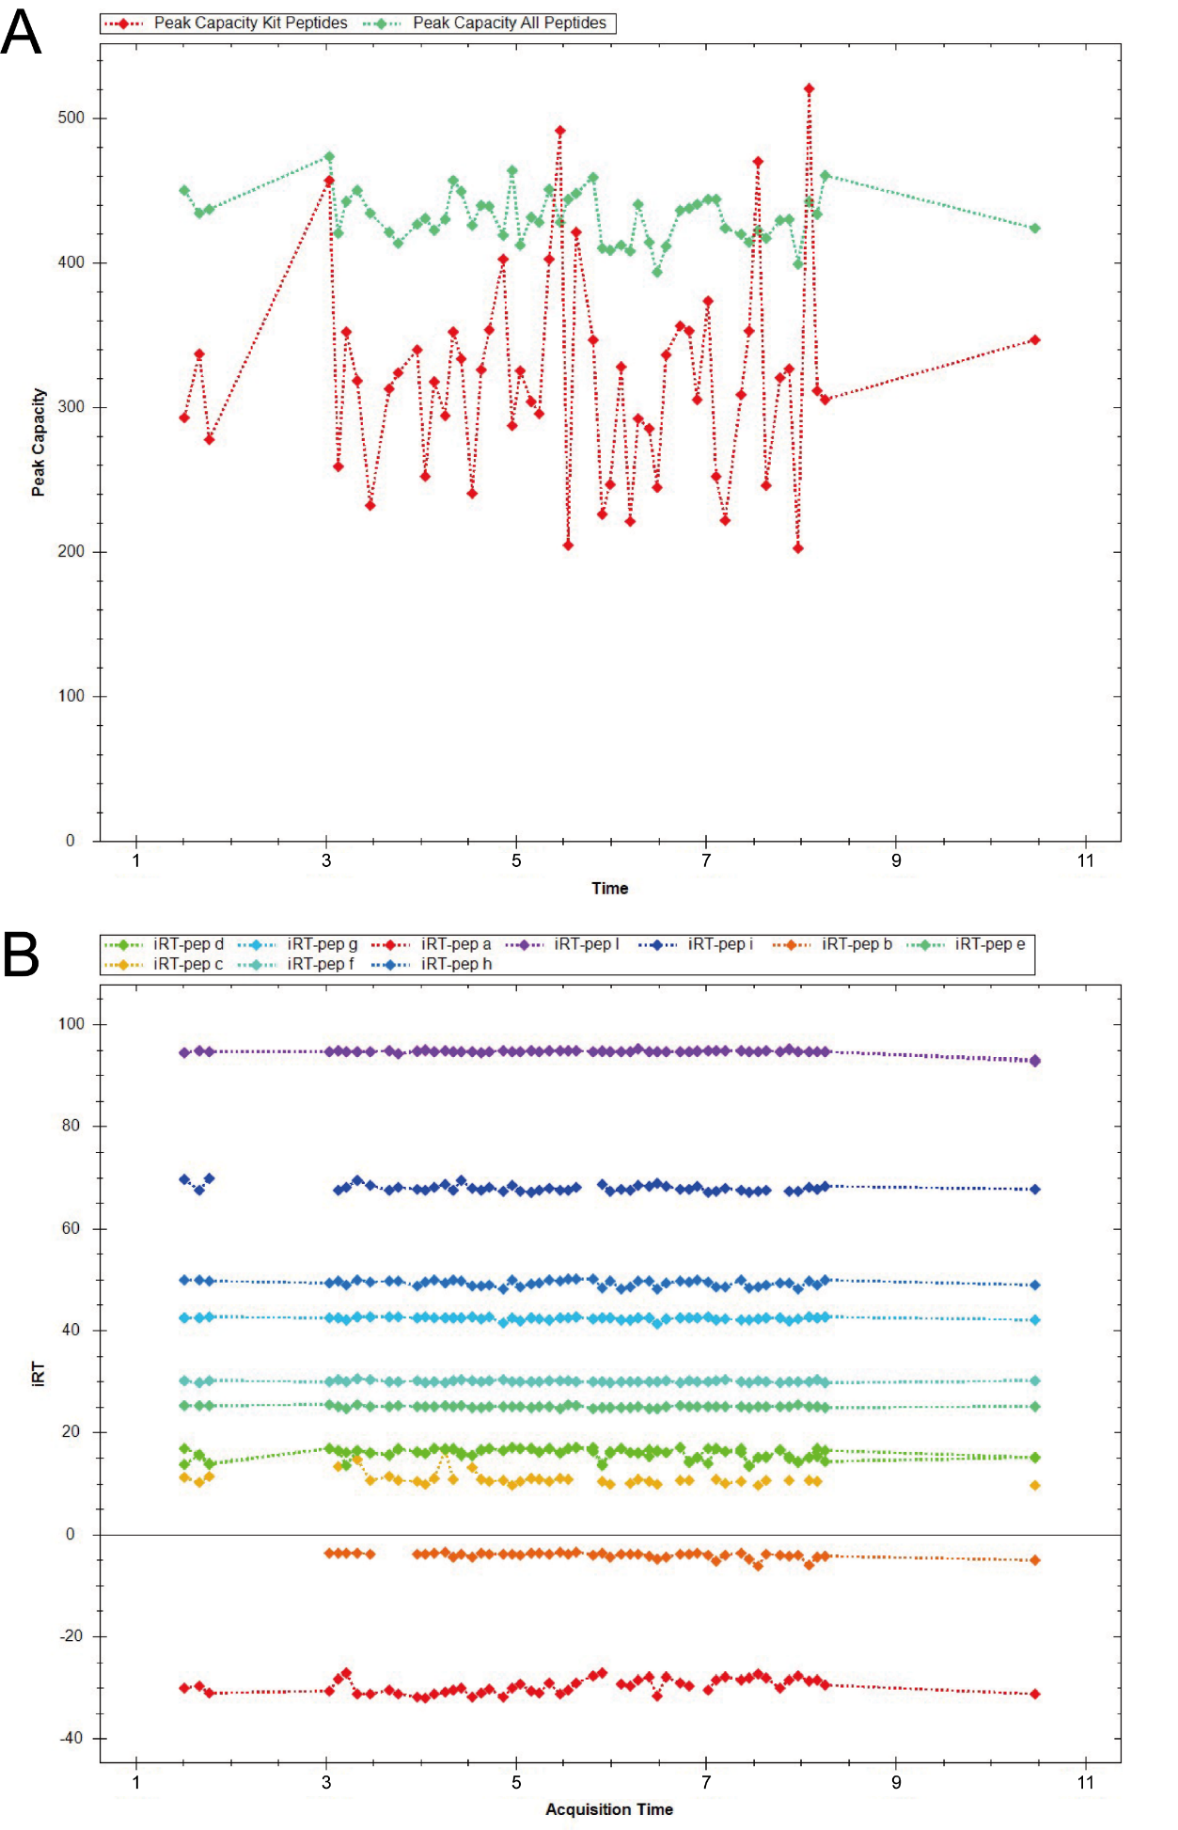


**Supplemental Figure 1** Quality control of DIA. (A) the peak capacity is within the normal range at multiple time points, meeting the quantitative analysis requirements. (B) the retention time of IRTs was generally stable at multiple time points. Quality control showed that the chromatographic column has good separation analysis ability and stability.

**Abbreviations:** iRT, Retention time normalization kit for time-resolved massspectrometry.


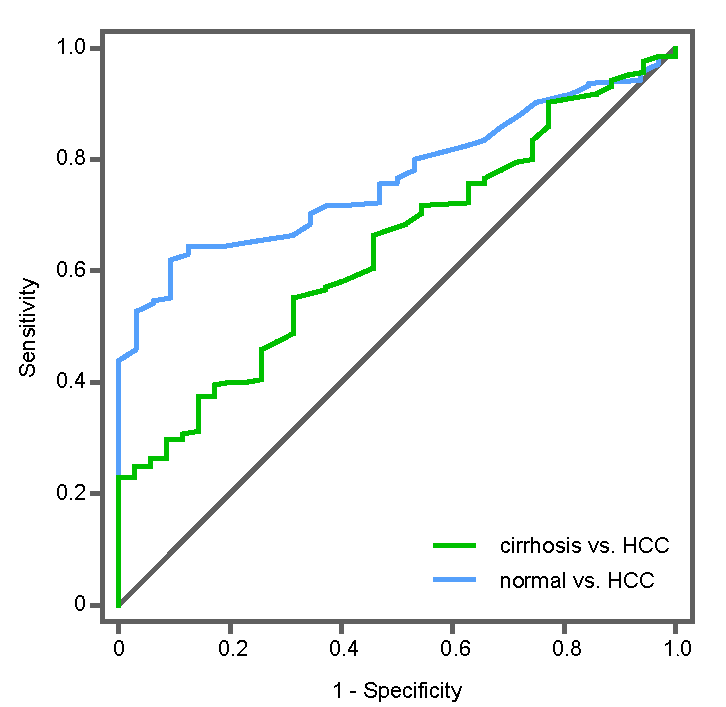


**Supplemental Figure 2** Receiver operating characteristics (ROC) curve analyses using KLKB1 for discriminating HCC patients from healthy subjects or cirrhosis patients.


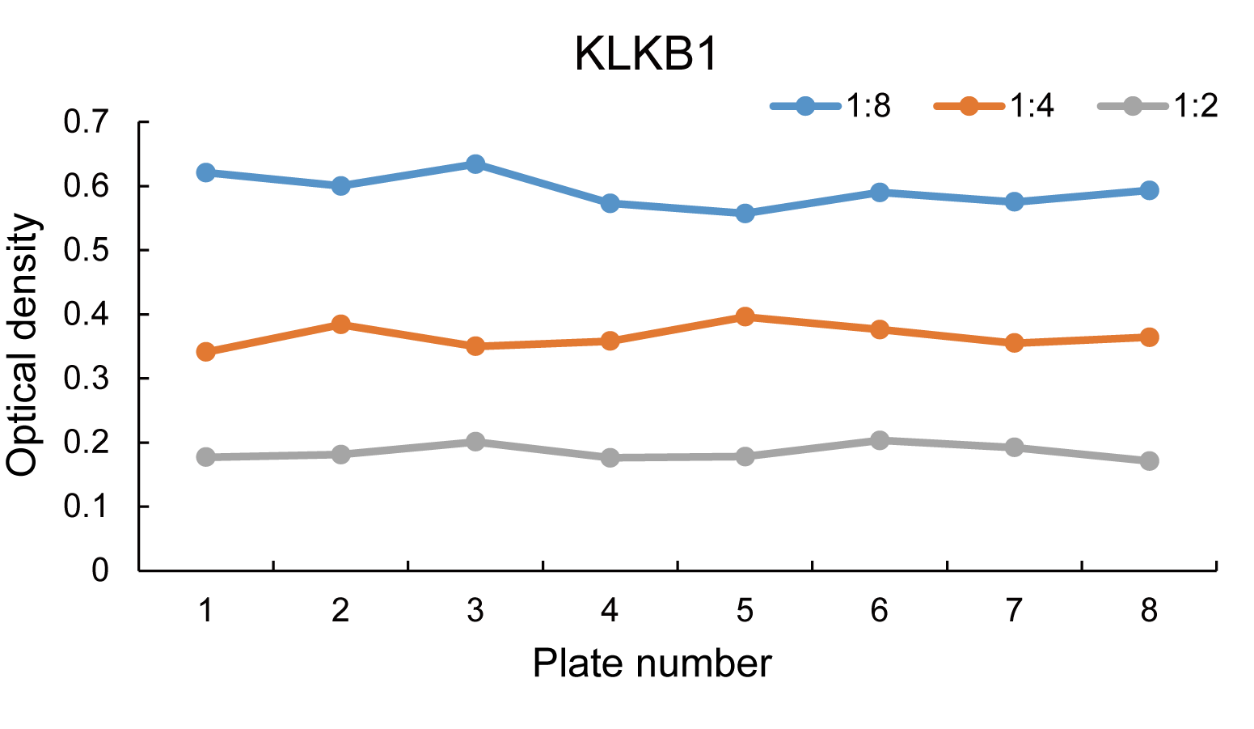


**Supplemental Figure 3** Inter-assay precision was assessed using 3 samples per assay. The coefficient of variation (CV) of KLKB1 ELISA microplates were less than 10%.

**Supplemental Table 1** enrichment analyses of differentially expressed proteins

| Category | Term | Count | % | PValue | Genes | List Total | Pop Hits | Pop Total | Fold Enrichment | Bonferroni | Benjamini | FDR |
| --- | --- | --- | --- | --- | --- | --- | --- | --- | --- | --- | --- | --- |
| GOTERM_BP_DIRECT | GO:0006956~complement activation | 14 | 18.42105 | 2.29E-17 | C1QB, C1QA, C1S, IGKV1-5, IGLV3-1, IGLV7-43, C8B, IGHG2, IGLV1-40, C7, IGLV3-21, IGKV3-15, IGLV3-19, MBL2 | 70 | 87 | 16792 | 38.6023 | 1.16E-14 | 1.16E-14 | 1.11E-14 |
| GOTERM_BP_DIRECT | GO:0006958~complement activation, classical pathway | 14 | 18.42105 | 1.33E-16 | C1QB, C1QA, C1S, IGKV1-5, IGLV3-1, IGLV7-43, C8B, IGHG2, IGLV1-40, C7, IGLV3-21, IGKV3-15, IGLV3-19, MBL2 | 70 | 99 | 16792 | 33.92323 | 5.65E-14 | 3.37E-14 | 3.23E-14 |
| GOTERM_BP_DIRECT | GO:0006898~receptor-mediated endocytosis | 12 | 15.78947 | 2.39E-10 | IGLV1-40, LRP1, IGLV3-21, CD5L, IGKV1-5, SAA1, IGKV3-15, IGLV3-1, CD14, IGLV7-43, APOE, IGLV3-19 | 70 | 186 | 16792 | 15.4765 | 1.22E-07 | 4.04E-08 | 3.87E-08 |
| GOTERM_BP_DIRECT | GO:0006508~proteolysis | 16 | 21.05263 | 1.35E-09 | C1QB, C1QA, C1S, IGKV1-5, IGLV3-1, IGLV7-43, IGHG2, PROC, IGLV1-40, IGLV3-21, DPEP2, IGKV3-15, KLKB1, HABP2, IGLV3-19, MBL2 | 70 | 500 | 16792 | 7.676343 | 6.85E-07 | 1.71E-07 | 1.63E-07 |
| GOTERM_BP_DIRECT | GO:0038096~Fc-gamma receptor signaling pathway involved in phagocytosis | 9 | 11.84211 | 4.87E-08 | IGLV1-40, IGHG2, IGLV3-21, IGKV1-5, IGKV3-15, IGLV3-1, IGLV7-43, CRK, IGLV3-19 | 70 | 127 | 16792 | 16.99978 | 2.48E-05 | 4.95E-06 | 4.73E-06 |
| GOTERM_BP_DIRECT | GO:0006953~acute-phase response | 6 | 7.894737 | 5.22E-07 | CRP, SERPINA1, SAA1, SAA2, LBP, MBL2 | 70 | 39 | 16792 | 36.90549 | 0.000266 | 4.42E-05 | 4.23E-05 |
| GOTERM_BP_DIRECT | GO:0050776~regulation of immune response | 9 | 11.84211 | 6.56E-07 | VCAM1, IGLV1-40, IGLV3-21, IGKV1-5, IGKV3-15, IGLV3-1, IGLV7-43, B2M, IGLV3-19 | 70 | 178 | 16792 | 12.12905 | 0.000334 | 4.76E-05 | 4.56E-05 |
| GOTERM_BP_DIRECT | GO:0002576~platelet degranulation | 7 | 9.210526 | 4.03E-06 | ISLR, SERPINA1, VWF, IGF2, QSOX1, A2M, TTN | 70 | 103 | 16792 | 16.30291 | 0.00205 | 0.000256 | 0.000245 |
| GOTERM_BP_DIRECT | GO:0010951~negative regulation of endopeptidase activity | 7 | 9.210526 | 1.02E-05 | SERPINA11, SERPINA1, SERPINC1, COL6A3, PEBP1, ITIH1, A2M | 70 | 121 | 16792 | 13.87769 | 0.005192 | 0.000577 | 0.000552 |
| GOTERM_BP_DIRECT | GO:0030198~extracellular matrix organization | 8 | 10.52632 | 1.55E-05 | VCAM1, VWF, CDH1, COL5A2, COL6A1, COL6A3, HSPG2, CD44 | 70 | 196 | 16792 | 9.791254 | 0.007868 | 0.000788 | 0.000754 |
| GOTERM_BP_DIRECT | GO:0042157~lipoprotein metabolic process | 5 | 6.578947 | 1.73E-05 | LRP1, APOC3, LCAT, APOE, HSPG2 | 70 | 38 | 16792 | 31.56391 | 0.008789 | 0.000801 | 0.000766 |
| GOTERM_BP_DIRECT | GO:0006955~immune response | 10 | 13.15789 | 5.38E-05 | IGLV1-40, C7, IGLV3-21, IGKV1-5, IGKV3-15, IGLV3-1, IGLV7-43, C8B, B2M, IGLV3-19 | 70 | 421 | 16792 | 5.697998 | 0.027007 | 0.002277 | 0.002178 |
| GOTERM_BP_DIRECT | GO:0045087~innate immune response | 10 | 13.15789 | 6.33E-05 | C1QB, C1QA, IGHG2, C1S, SAA1, CD14, LBP, DDX60, B2M, MBL2 | 70 | 430 | 16792 | 5.578738 | 0.031711 | 0.002474 | 0.002367 |
| GOTERM_BP_DIRECT | GO:0038095~Fc-epsilon receptor signaling pathway | 7 | 9.210526 | 8.99E-05 | IGLV1-40, IGLV3-21, IGKV1-5, IGKV3-15, IGLV3-1, IGLV7-43, IGLV3-19 | 70 | 178 | 16792 | 9.433708 | 0.044728 | 0.003262 | 0.003121 |
| GOTERM_BP_DIRECT | GO:0044267~cellular protein metabolic process | 6 | 7.894737 | 0.000124 | IGFBP3, IGFBP2, SAA1, IGF2, B2M, HSPG2 | 70 | 118 | 16792 | 12.19758 | 0.060948 | 0.004184 | 0.004003 |
| GOTERM_BP_DIRECT | GO:0022617~extracellular matrix disassembly | 5 | 6.578947 | 0.000268 | CDH1, A2M, KLKB1, HSPG2, CD44 | 70 | 76 | 16792 | 15.78195 | 0.127556 | 0.008511 | 0.008142 |
| GOTERM_BP_DIRECT | GO:0007155~cell adhesion | 9 | 11.84211 | 0.000569 | ISLR, VCAM1, VWF, COL6A1, COL6A3, DSG2, LYVE1, CD44, HABP2 | 70 | 459 | 16792 | 4.703641 | 0.251475 | 0.017 | 0.016264 |
| GOTERM_BP_DIRECT | GO:0046470~phosphatidylcholine metabolic process | 3 | 3.947368 | 0.000733 | PON1, LCAT, GPLD1 | 70 | 10 | 16792 | 71.96571 | 0.31152 | 0.0196 | 0.018751 |
| GOTERM_BP_DIRECT | GO:0008228~opsonization | 3 | 3.947368 | 0.000733 | CRP, LBP, MBL2 | 70 | 10 | 16792 | 71.96571 | 0.31152 | 0.0196 | 0.018751 |
| GOTERM_BP_DIRECT | GO:0006957~complement activation, alternative pathway | 3 | 3.947368 | 0.001261 | C7, CFHR5, C8B | 70 | 13 | 16792 | 55.35824 | 0.473779 | 0.032018 | 0.030632 |
| GOTERM_BP_DIRECT | GO:0010875~positive regulation of cholesterol efflux | 3 | 3.947368 | 0.001467 | LRP1, PON1, APOE | 70 | 14 | 16792 | 51.40408 | 0.526276 | 0.035482 | 0.033945 |
| GOTERM_BP_DIRECT | GO:0034375~high-density lipoprotein particle remodeling | 3 | 3.947368 | 0.001688 | APOC3, LCAT, APOE | 70 | 15 | 16792 | 47.97714 | 0.576788 | 0.038976 | 0.037288 |
| GOTERM_BP_DIRECT | GO:0001523~retinoid metabolic process | 4 | 5.263158 | 0.002015 | LRP1, APOC3, APOE, HSPG2 | 70 | 61 | 16792 | 15.73021 | 0.641851 | 0.044511 | 0.042584 |
| GOTERM_BP_DIRECT | GO:0007597~blood coagulation, intrinsic pathway | 3 | 3.947368 | 0.00244 | VWF, A2M, KLKB1 | 70 | 18 | 16792 | 39.98095 | 0.711629 | 0.049582 | 0.047435 |
| GOTERM_BP_DIRECT | GO:0043691~reverse cholesterol transport | 3 | 3.947368 | 0.00244 | APOC3, LCAT, APOE | 70 | 18 | 16792 | 39.98095 | 0.711629 | 0.049582 | 0.047435 |
| GOTERM_BP_DIRECT | GO:0070328~triglyceride homeostasis | 3 | 3.947368 | 0.005074 | APOC4, APOC3, APOE | 70 | 26 | 16792 | 27.67912 | 0.924941 | 0.097014 | 0.092812 |
| GOTERM_BP_DIRECT | GO:0050830~defense response to Gram-positive bacterium | 4 | 5.263158 | 0.005156 | CRP, LBP, B2M, MBL2 | 70 | 85 | 16792 | 11.28874 | 0.928016 | 0.097014 | 0.092812 |
| GOTERM_BP_DIRECT | GO:0016337~single organismal cell-cell adhesion | 4 | 5.263158 | 0.008304 | VCAM1, CD93, CDH1, CD44 | 70 | 101 | 16792 | 9.500424 | 0.985655 | 0.150657 | 0.144133 |
| GOTERM_BP_DIRECT | GO:0010897~negative regulation of triglyceride catabolic process | 2 | 2.631579 | 0.016337 | APOC3, GPLD1 | 70 | 4 | 16792 | 119.9429 | 0.999772 | 0.286176 | 0.273783 |
| GOTERM_BP_DIRECT | GO:0032489~regulation of Cdc42 protein signal transduction | 2 | 2.631579 | 0.02038 | APOC3, APOE | 70 | 5 | 16792 | 95.95429 | 0.999972 | 0.345097 | 0.330152 |
| GOTERM_BP_DIRECT | GO:0034382~chylomicron remnant clearance | 2 | 2.631579 | 0.024406 | APOC3, APOE | 70 | 6 | 16792 | 79.9619 | 0.999997 | 0.399949 | 0.382628 |
| GOTERM_BP_DIRECT | GO:0034372~very-low-density lipoprotein particle remodeling | 2 | 2.631579 | 0.028417 | LCAT, APOE | 70 | 7 | 16792 | 68.53878 | 1 | 0.41341 | 0.395506 |
| GOTERM_BP_DIRECT | GO:0043567~regulation of insulin-like growth factor receptor signaling pathway | 2 | 2.631579 | 0.028417 | IGFBP3, IGFBP2 | 70 | 7 | 16792 | 68.53878 | 1 | 0.41341 | 0.395506 |
| GOTERM_BP_DIRECT | GO:0030574~collagen catabolic process | 3 | 3.947368 | 0.028483 | COL5A2, COL6A1, COL6A3 | 70 | 64 | 16792 | 11.24464 | 1 | 0.41341 | 0.395506 |
| GOTERM_BP_DIRECT | GO:0042632~cholesterol homeostasis | 3 | 3.947368 | 0.028483 | APOC3, LCAT, APOE | 70 | 64 | 16792 | 11.24464 | 1 | 0.41341 | 0.395506 |
| GOTERM_BP_DIRECT | GO:0008203~cholesterol metabolic process | 3 | 3.947368 | 0.03185 | PON1, LCAT, APOE | 70 | 68 | 16792 | 10.58319 | 1 | 0.449437 | 0.429973 |
| GOTERM_BP_DIRECT | GO:0060333~interferon-gamma-mediated signaling pathway | 3 | 3.947368 | 0.034473 | VCAM1, B2M, CD44 | 70 | 71 | 16792 | 10.13602 | 1 | 0.472153 | 0.451705 |
| GOTERM_BP_DIRECT | GO:0071223~cellular response to lipoteichoic acid | 2 | 2.631579 | 0.036388 | CD14, LBP | 70 | 9 | 16792 | 53.30794 | 1 | 0.472153 | 0.451705 |
| GOTERM_BP_DIRECT | GO:0042158~lipoprotein biosynthetic process | 2 | 2.631579 | 0.036388 | LCAT, APOE | 70 | 9 | 16792 | 53.30794 | 1 | 0.472153 | 0.451705 |
| GOTERM_BP_DIRECT | GO:0007584~response to nutrient | 3 | 3.947368 | 0.037177 | VCAM1, SERPINC1, IGFBP2 | 70 | 74 | 16792 | 9.725097 | 1 | 0.472153 | 0.451705 |
| GOTERM_BP_DIRECT | GO:0006869~lipid transport | 3 | 3.947368 | 0.039024 | APOC4, APOC3, APOE | 70 | 76 | 16792 | 9.469173 | 1 | 0.483521 | 0.462581 |
| GOTERM_BP_DIRECT | GO:0007596~blood coagulation | 4 | 5.263158 | 0.040053 | SERPINA1, PROC, VWF, SERPINC1 | 70 | 184 | 16792 | 5.214907 | 1 | 0.484448 | 0.463468 |
| GOTERM_BP_DIRECT | GO:0050728~negative regulation of inflammatory response | 3 | 3.947368 | 0.041859 | PROC, SAA1, APOE | 70 | 79 | 16792 | 9.109584 | 1 | 0.494385 | 0.472974 |
| GOTERM_BP_DIRECT | GO:0001503~ossification | 3 | 3.947368 | 0.042821 | COL5A2, IGF2, GPLD1 | 70 | 80 | 16792 | 8.995714 | 1 | 0.494385 | 0.472974 |
| GOTERM_BP_DIRECT | GO:0030195~negative regulation of blood coagulation | 2 | 2.631579 | 0.048225 | PROC, APOE | 70 | 12 | 16792 | 39.98095 | 1 | 0.544411 | 0.520834 |
| GOTERM_BP_DIRECT | GO:0007160~cell-matrix adhesion | 3 | 3.947368 | 0.052879 | VCAM1, LYVE1, CD44 | 70 | 90 | 16792 | 7.99619 | 1 | 0.583972 | 0.558682 |
| GOTERM_BP_DIRECT | GO:0033700~phospholipid efflux | 2 | 2.631579 | 0.056037 | APOC3, APOE | 70 | 14 | 16792 | 34.26939 | 1 | 0.593058 | 0.567374 |
| GOTERM_BP_DIRECT | GO:0014912~negative regulation of smooth muscle cell migration | 2 | 2.631579 | 0.056037 | LRP1, IGFBP3 | 70 | 14 | 16792 | 34.26939 | 1 | 0.593058 | 0.567374 |
| GOTERM_BP_DIRECT | GO:0030214~hyaluronan catabolic process | 2 | 2.631579 | 0.059919 | LYVE1, CD44 | 70 | 15 | 16792 | 31.98476 | 1 | 0.608778 | 0.582413 |
| GOTERM_BP_DIRECT | GO:0051044~positive regulation of membrane protein ectodomain proteolysis | 2 | 2.631579 | 0.059919 | APOE, GPLD1 | 70 | 15 | 16792 | 31.98476 | 1 | 0.608778 | 0.582413 |
| GOTERM_BP_DIRECT | GO:0044130~negative regulation of growth of symbiont in host | 2 | 2.631579 | 0.063785 | LBP, MBL2 | 70 | 16 | 16792 | 29.98571 | 1 | 0.635353 | 0.607837 |
| GOTERM_BP_DIRECT | GO:0034142~toll-like receptor 4 signaling pathway | 2 | 2.631579 | 0.071471 | CD14, LBP | 70 | 18 | 16792 | 26.65397 | 1 | 0.698218 | 0.66798 |
| GOTERM_BP_DIRECT | GO:0071222~cellular response to lipopolysaccharide | 3 | 3.947368 | 0.078729 | CD14, LBP, B2M | 70 | 113 | 16792 | 6.368647 | 1 | 0.754609 | 0.721929 |
| GOTERM_BP_DIRECT | GO:0019835~cytolysis | 2 | 2.631579 | 0.082883 | C7, C8B | 70 | 21 | 16792 | 22.84626 | 1 | 0.779717 | 0.745949 |
| GOTERM_BP_DIRECT | GO:0019433~triglyceride catabolic process | 2 | 2.631579 | 0.097885 | APOC3, APOE | 70 | 25 | 16792 | 19.19086 | 1 | 0.872376 | 0.834596 |
| GOTERM_BP_DIRECT | GO:0033344~cholesterol efflux | 2 | 2.631579 | 0.097885 | APOC3, APOE | 70 | 25 | 16792 | 19.19086 | 1 | 0.872376 | 0.834596 |
| GOTERM_BP_DIRECT | GO:0050715~positive regulation of cytokine secretion | 2 | 2.631579 | 0.097885 | SAA1, CD14 | 70 | 25 | 16792 | 19.19086 | 1 | 0.872376 | 0.834596 |
| GOTERM_CC_DIRECT | GO:0005576~extracellular region | 47 | 61.84211 | 4.91E-31 | C1QB, CRP, C1QA, SERPINA1, C1S, SERPINC1, PON1, CD5L, LCAT, IGLV3-1, C8B, ITIH1, TTN, ISLR, IGLV1-40, EFEMP1, IGHG2, C7, CDH1, IGLV3-21, IGKV3-15, QSOX1, LBP, APOE, CD14, A2M, B2M, HABP2, MBL2, VWF, IGFBP3, IGKV1-5, IGFBP2, IGF2, APOC3, IGLV7-43, HSPG2, LRG1, PROC, COL5A2, COL6A1, SAA1, COL6A3, CFHR5, SHBG, KLKB1, IGLV3-19 | 73 | 1610 | 18224 | 7.287739 | 6.04E-29 | 6.04E-29 | 5.31E-29 |
| GOTERM_CC_DIRECT | GO:0070062~extracellular exosome | 49 | 64.47368 | 1.17E-22 | SERPINA1, PEBP1, C8B, ISLR, EFEMP1, IGHG2, CDH1, QSOX1, LBP, B2M, VWF, IGFBP3, IGFBP2, HSPG2, COL6A1, MMRN2, COL6A3, DSG2, CRK, GPLD1, CD44, IGLV3-19, C1QB, CRP, C1QA, C1S, SERPINC1, CD5L, PON1, LCAT, ITIH1, TTN, C7, IGLV3-21, CD14, APOE, A2M, VCAM1, IGKV1-5, IGF2, APOC3, LYVE1, VASN, LRG1, SAA1, SAA2, NUCB1, SHBG, KLKB1 | 73 | 2811 | 18224 | 4.351671 | 1.43E-20 | 7.17E-21 | 6.29E-21 |
| GOTERM_CC_DIRECT | GO:0005615~extracellular space | 33 | 43.42105 | 6.31E-18 | SERPINA11, CRP, SERPINA1, SERPINC1, PON1, CD5L, LCAT, C8B, EFEMP1, IGHG2, QSOX1, LBP, APOE, CD14, B2M, HABP2, MBL2, VCAM1, IGFBP3, IGFBP2, IGF2, APOC3, HSPG2, VASN, LRG1, PROC, MMRN2, SAA1, COL6A3, SAA2, NUCB1, KLKB1, GPLD1 | 73 | 1347 | 18224 | 6.115996 | 7.76E-16 | 2.59E-16 | 2.27E-16 |
| GOTERM_CC_DIRECT | GO:0072562~blood microparticle | 12 | 15.78947 | 1.84E-11 | C1QB, IGHG2, C1S, IGLV3-21, SERPINC1, PON1, CD5L, IGKV1-5, IGKV3-15, APOE, ITIH1, A2M | 73 | 152 | 18224 | 19.70872 | 2.27E-09 | 5.66E-10 | 4.97E-10 |
| GOTERM_CC_DIRECT | GO:0034364~high-density lipoprotein particle | 6 | 7.894737 | 2.09E-08 | PON1, SAA1, APOC4, SAA2, LCAT, APOE | 73 | 22 | 18224 | 68.08468 | 2.57E-06 | 5.14E-07 | 4.51E-07 |
| GOTERM_CC_DIRECT | GO:0031093~platelet alpha granule lumen | 6 | 7.894737 | 2.49E-06 | ISLR, SERPINA1, VWF, IGF2, QSOX1, A2M | 73 | 55 | 18224 | 27.23387 | 0.000307 | 5.11E-05 | 4.49E-05 |
| GOTERM_CC_DIRECT | GO:0031012~extracellular matrix | 9 | 11.84211 | 2.14E-05 | EFEMP1, CD93, VWF, MMRN2, COL5A2, COL6A1, COL6A3, APOE, HSPG2 | 73 | 296 | 18224 | 7.590522 | 0.002631 | 0.000376 | 0.00033 |
| GOTERM_CC_DIRECT | GO:0005581~collagen trimer | 6 | 7.894737 | 3.15E-05 | C1QB, C1QA, COL5A2, COL6A1, COL6A3, MBL2 | 73 | 92 | 18224 | 16.28112 | 0.003865 | 0.000484 | 0.000425 |
| GOTERM_CC_DIRECT | GO:0005788~endoplasmic reticulum lumen | 6 | 7.894737 | 0.000974 | SERPINA1, PROC, COL5A2, COL6A1, COL6A3, B2M | 73 | 192 | 18224 | 7.80137 | 0.112912 | 0.013306 | 0.011683 |
| GOTERM_CC_DIRECT | GO:0034361~very-low-density lipoprotein particle | 3 | 3.947368 | 0.002793 | APOC4, APOC3, APOE | 73 | 20 | 18224 | 37.44658 | 0.291092 | 0.034355 | 0.030165 |
| GOTERM_CC_DIRECT | GO:0005578~proteinaceous extracellular matrix | 6 | 7.894737 | 0.004158 | SERPINA1, EFEMP1, VWF, COL5A2, COL6A3, GPLD1 | 73 | 268 | 18224 | 5.589041 | 0.400993 | 0.046492 | 0.040823 |
| GOTERM_CC_DIRECT | GO:0005794~Golgi apparatus | 10 | 13.15789 | 0.006741 | SERPINA1, VCAM1, PROC, GORASP1, NUCB1, QSOX1, CD14, APOE, B2M, CD44 | 73 | 863 | 18224 | 2.892744 | 0.564818 | 0.069099 | 0.060672 |
| GOTERM_CC_DIRECT | GO:0005602~complement component C1 complex | 2 | 2.631579 | 0.007886 | C1QB, C1QA | 73 | 2 | 18224 | 249.6438 | 0.622376 | 0.074616 | 0.065517 |
| GOTERM_CC_DIRECT | GO:0005589~collagen type VI trimer | 2 | 2.631579 | 0.011806 | COL6A1, COL6A3 | 73 | 3 | 18224 | 166.4292 | 0.767955 | 0.103727 | 0.091078 |
| GOTERM_CC_DIRECT | GO:0034363~intermediate-density lipoprotein particle | 2 | 2.631579 | 0.015711 | APOC3, APOE | 73 | 4 | 18224 | 124.8219 | 0.857416 | 0.128277 | 0.112634 |
| GOTERM_CC_DIRECT | GO:1903561~extracellular vesicle | 3 | 3.947368 | 0.016686 | COL6A3, APOE, C8B | 73 | 50 | 18224 | 14.97863 | 0.873783 | 0.128277 | 0.112634 |
| GOTERM_CC_DIRECT | GO:0009986~cell surface | 7 | 9.210526 | 0.020111 | VCAM1, CD93, DSG2, LBP, CD44, VASN, MBL2 | 73 | 542 | 18224 | 3.224182 | 0.917821 | 0.145509 | 0.127764 |
| GOTERM_CC_DIRECT | GO:0033116~endoplasmic reticulum-Golgi intermediate compartment membrane | 3 | 3.947368 | 0.026508 | SERPINA1, GORASP1, ASPSCR1 | 73 | 64 | 18224 | 11.70205 | 0.96328 | 0.176956 | 0.155376 |
| GOTERM_CC_DIRECT | GO:0005579~membrane attack complex | 2 | 2.631579 | 0.027335 | C7, C8B | 73 | 7 | 18224 | 71.32681 | 0.966925 | 0.176956 | 0.155376 |
| GOTERM_CC_DIRECT | GO:0034366~spherical high-density lipoprotein particle | 2 | 2.631579 | 0.031179 | PON1, APOC3 | 73 | 8 | 18224 | 62.41096 | 0.979678 | 0.191751 | 0.168366 |
| GOTERM_CC_DIRECT | GO:0005886~plasma membrane | 24 | 31.57895 | 0.043438 | VCAM1, LRP1, CD93, SERPINC1, IGKV1-5, ASPSCR1, IGF2, IGLV3-1, IGLV7-43, HSPG2, LYVE1, VASN, IGLV1-40, CDH1, IGLV3-21, IGKV3-15, DSG2, CD14, APOE, KLKB1, CRK, B2M, CD44, IGLV3-19 | 73 | 4121 | 18224 | 1.453883 | 0.995757 | 0.24896 | 0.218599 |
| GOTERM_CC_DIRECT | GO:0042383~sarcolemma | 3 | 3.947368 | 0.044529 | VCAM1, COL6A1, COL6A3 | 73 | 85 | 18224 | 8.810959 | 0.996312 | 0.24896 | 0.218599 |
| GOTERM_CC_DIRECT | GO:0042627~chylomicron | 2 | 2.631579 | 0.053932 | APOC3, APOE | 73 | 14 | 18224 | 35.66341 | 0.998907 | 0.28842 | 0.253247 |
| GOTERM_CC_DIRECT | GO:0071682~endocytic vesicle lumen | 2 | 2.631579 | 0.061399 | SAA1, APOE | 73 | 16 | 18224 | 31.20548 | 0.999588 | 0.305669 | 0.268392 |
| GOTERM_CC_DIRECT | GO:0005769~early endosome | 4 | 5.263158 | 0.062128 | VCAM1, APOC3, NUCB1, APOE | 73 | 229 | 18224 | 4.360591 | 0.999625 | 0.305669 | 0.268392 |
| GOTERM_CC_DIRECT | GO:0005925~focal adhesion | 5 | 6.578947 | 0.068932 | LRP1, CDH1, B2M, HSPG2, CD44 | 73 | 391 | 18224 | 3.192376 | 0.999847 | 0.326101 | 0.286332 |
| GOTERM_CC_DIRECT | GO:0005765~lysosomal membrane | 4 | 5.263158 | 0.094336 | LRP1, COL6A1, GPLD1, VASN | 73 | 274 | 18224 | 3.644436 | 0.999995 | 0.429755 | 0.377346 |
| GOTERM_MF_DIRECT | GO:0004252~serine-type endopeptidase activity | 15 | 19.73684 | 1.66E-12 | C1QB, C1QA, C1S, IGKV1-5, IGLV3-1, IGLV7-43, IGHG2, PROC, IGLV1-40, IGLV3-21, IGKV3-15, KLKB1, HABP2, IGLV3-19, MBL2 | 70 | 255 | 16881 | 14.18571 | 2.58E-10 | 2.58E-10 | 2.51E-10 |
| GOTERM_MF_DIRECT | GO:0003823~antigen binding | 8 | 10.52632 | 2.03E-07 | IGLV1-40, IGHG2, IGLV3-21, IGKV1-5, IGKV3-15, IGLV3-1, IGLV7-43, IGLV3-19 | 70 | 103 | 16881 | 18.73065 | 3.14E-05 | 1.57E-05 | 1.53E-05 |
| GOTERM_MF_DIRECT | GO:0005509~calcium ion binding | 15 | 19.73684 | 9.68E-07 | CRP, LRP1, CD93, C1S, PON1, ITIH1, HSPG2, TTN, PROC, EFEMP1, CDH1, NUCB1, DSG2, HABP2, MBL2 | 70 | 717 | 16881 | 5.045129 | 0.00015 | 5E-05 | 4.87E-05 |
| GOTERM_MF_DIRECT | GO:0004867~serine-type endopeptidase inhibitor activity | 7 | 9.210526 | 2.76E-06 | SERPINA11, SERPINA1, SERPINC1, COL6A3, PEBP1, ITIH1, A2M | 70 | 97 | 16881 | 17.40309 | 0.000427 | 0.000107 | 0.000104 |
| GOTERM_MF_DIRECT | GO:0002020~protease binding | 6 | 7.894737 | 5.76E-05 | SERPINA1, LRP1, VWF, SERPINC1, A2M, TTN | 70 | 101 | 16881 | 14.32617 | 0.008885 | 0.001785 | 0.001739 |
| GOTERM_MF_DIRECT | GO:0001948~glycoprotein binding | 4 | 5.263158 | 0.002382 | SERPINA1, VWF, CDH1, B2M | 70 | 65 | 16881 | 14.84044 | 0.308988 | 0.061526 | 0.059938 |
| GOTERM_MF_DIRECT | GO:0005540~hyaluronic acid binding | 3 | 3.947368 | 0.003941 | LYVE1, CD44, HABP2 | 70 | 23 | 16881 | 31.45528 | 0.457772 | 0.087266 | 0.085014 |
| GOTERM_MF_DIRECT | GO:0070891~lipoteichoic acid binding | 2 | 2.631579 | 0.016251 | CD14, LBP | 70 | 4 | 16881 | 120.5786 | 0.921104 | 0.314867 | 0.306742 |
| GOTERM_MF_DIRECT | GO:0050839~cell adhesion molecule binding | 3 | 3.947368 | 0.026597 | VCAM1, CDH1, DSG2 | 70 | 62 | 16881 | 11.66889 | 0.984675 | 0.458053 | 0.446233 |
| GOTERM_MF_DIRECT | GO:0031995~insulin-like growth factor II binding | 2 | 2.631579 | 0.032242 | IGFBP3, IGFBP2 | 70 | 8 | 16881 | 60.28929 | 0.993779 | 0.499752 | 0.486855 |
| GOTERM_MF_DIRECT | GO:0001849~complement component C1q binding | 2 | 2.631579 | 0.0362 | CRP, CD93 | 70 | 9 | 16881 | 53.59048 | 0.996704 | 0.510085 | 0.496922 |
| GOTERM_MF_DIRECT | GO:0031994~insulin-like growth factor I binding | 2 | 2.631579 | 0.047977 | IGFBP3, IGFBP2 | 70 | 12 | 16881 | 40.19286 | 0.99951 | 0.57594 | 0.561077 |
| GOTERM_MF_DIRECT | GO:0005543~phospholipid binding | 3 | 3.947368 | 0.048305 | PON1, APOC3, APOE | 70 | 86 | 16881 | 8.412458 | 0.999535 | 0.57594 | 0.561077 |
| GOTERM_MF_DIRECT | GO:0050750~low-density lipoprotein particle receptor binding | 2 | 2.631579 | 0.063459 | CRP, APOE | 70 | 16 | 16881 | 30.14464 | 0.999961 | 0.702584 | 0.684453 |
| GOTERM_MF_DIRECT | GO:0005319~lipid transporter activity | 2 | 2.631579 | 0.078693 | APOC4, APOE | 70 | 20 | 16881 | 24.11571 | 0.999997 | 0.813166 | 0.792181 |
| GOTERM_MF_DIRECT | GO:0001530~lipopolysaccharide binding | 2 | 2.631579 | 0.086219 | CD14, LBP | 70 | 22 | 16881 | 21.92338 | 0.999999 | 0.835244 | 0.813689 |
| KEGG_PATHWAY | hsa04610:Complement and coagulation cascades | 12 | 15.78947 | 4.96E-15 | C1QB, C1QA, SERPINA1, PROC, VWF, C7, C1S, SERPINC1, A2M, C8B, KLKB1, MBL2 | 33 | 69 | 6879 | 36.25296 | 2.9E-13 | 2.93E-13 | 2.78E-13 |
| KEGG_PATHWAY | hsa04512:ECM-receptor interaction | 6 | 7.894737 | 4.44E-05 | VWF, COL5A2, COL6A1, COL6A3, HSPG2, CD44 | 33 | 87 | 6879 | 14.37618 | 0.002569 | 0.001308 | 0.001242 |
| KEGG_PATHWAY | hsa05020:Prion diseases | 4 | 5.263158 | 0.000496 | C1QB, C1QA, C7, C8B | 33 | 34 | 6879 | 24.52406 | 0.028376 | 0.009758 | 0.009262 |
| KEGG_PATHWAY | hsa05150:Staphylococcus aureus infection | 4 | 5.263158 | 0.001931 | C1QB, C1QA, C1S, MBL2 | 33 | 54 | 6879 | 15.44108 | 0.106048 | 0.028481 | 0.027033 |
| KEGG_PATHWAY | hsa05322:Systemic lupus erythematosus | 5 | 6.578947 | 0.003243 | C1QB, C1QA, C7, C1S, C8B | 33 | 134 | 6879 | 7.778155 | 0.171702 | 0.038264 | 0.036318 |
| KEGG_PATHWAY | hsa05133:Pertussis | 4 | 5.263158 | 0.00492 | C1QB, C1QA, C1S, CD14 | 33 | 75 | 6879 | 11.11758 | 0.248803 | 0.048384 | 0.045924 |
| KEGG_PATHWAY | hsa04510:Focal adhesion | 5 | 6.578947 | 0.014564 | VWF, COL5A2, COL6A1, COL6A3, CRK | 33 | 206 | 6879 | 5.059576 | 0.572985 | 0.122755 | 0.116514 |
| KEGG_PATHWAY | hsa04064:NF-kappa B signaling pathway | 3 | 3.947368 | 0.061405 | VCAM1, CD14, LBP | 33 | 87 | 6879 | 7.188088 | 0.974663 | 0.410732 | 0.389848 |
| KEGG_PATHWAY | hsa04974:Protein digestion and absorption | 3 | 3.947368 | 0.062654 | COL5A2, COL6A1, COL6A3 | 33 | 88 | 6879 | 7.106405 | 0.976547 | 0.410732 | 0.389848 |
| KEGG_PATHWAY | hsa05146:Amoebiasis | 3 | 3.947368 | 0.086549 | COL5A2, CD14, C8B | 33 | 106 | 6879 | 5.899657 | 0.994755 | 0.510641 | 0.484676 |

**Supplemental Table 2** Correlation between KLKB1 serum protein level and clinical parameters in patients with HCC

| Features | Group | n | KLKB1 (ng/mL) | *P* |
| --- | --- | --- | --- | --- |
| Age |  |  |  | 0.202 |
|  | ≤ 60 years | 141 | 300.5(157.6) |  |
|  | > 60 years | 64 | 308.5(179.9) |  |
| Sex |  |  |  | 0.731 |
|  | female | 35 | 289.8(152.4) |  |
|  | male | 170 | 303.8(148.7) |  |
| Stage |  |  |  | 0.134 |
|  | Ⅰ | 60 | 345.7(158.3) |  |
|  | Ⅱ | 61 | 300.5(152.9) |  |
|  | Ⅲ/Ⅳ | 84 | 292.9(149.2) |  |

**Supplemental Table 3** Correlation between KLKB1 expression and clinical parameters in HCC patients in TCGA database

| Features | n | KLKB1 | *P* |
| --- | --- | --- | --- |
| Age |  |  | 0.005 |
| ≤60 years | 176 | 4.186±1.297 |  |
| >60 years | 187 | 4.548±1.163 |  |
| Sex |  |  | 0.109 |
| female | 118 | 4.523±1.270 |  |
| male | 246 | 4.300±1.221 |  |
| Race |  |  | <0.001 |
| Asian | 158 | 4.037±1.274 |  |
| Black | 17 | 4.308±1.107 |  |
| White | 179 | 4.639±1.163 |  |
| AFP |  |  | 0.052 |
| normal | 112 | 4.624±1.107 |  |
| elevated | 146 | 4.343±1.173 |  |
| Bilirubin |  |  | 0.429 |
| normal | 249 | 4.505±1.159 |  |
| elevated | 43 | 4.355±1.090 |  |
| Alb |  |  | 0.222 |
| normal | 222 | 4.533±1.189 |  |
| decreased | 66 | 4.333±1.091 |  |
| Tumor stage |  |  | 0.002 |
| Ⅰ | 169 | 4.603±1.058 |  |
| Ⅱ | 82 | 4.178±1.259 |  |
| Ⅲ/Ⅳ | 84 | 4.082±1.435 |  |
| Tumor grade |  |  | <0.001 |
| G1 | 53 | 4.945±1.074 |  |
| G2 | 173 | 4.504±1.171 |  |
| G3 | 122 | 3.977±1.280 |  |
| G4 | 11 | 3.857±0.950 |  |
| Vascular invasion |  |  | 0.213 |
| none | 203 | 4.525±1.152 |  |
| micro | 89 | 4.274±1.190 |  |
| macro | 16 | 4.300±1.248 |  |
| hepatic tissue inflammation |  |  | 0.002 |
| none | 114 | 4.768±1.211 |  |
| mild | 98 | 4.200±1.172 |  |
| severe | 18 | 4.364±0.966 |  |
| Ishak fibrosis score |  |  | 0.049 |
| 0 (No Fibrosis) | 72 | 4.799±1.318 |  |
| 1,2 (Portal Fibrosis) | 31 | 4.254±1.140 |  |
| 3,4 (Fibrous Speta) | 28 | 4.279±1.160 |  |
| 5 (Nodular Formation and Incomplete Cirrhosis) | 9 | 3.910±0.893 |  |
| 6 (Established Cirrhosis) | 70 | 4.578±0.996 |  |

**Supplemental Table 4** hallmark gene sets enriched in patients with low KLKB1 expression

| NAME | GS<br> follow link to MSigDB | GS DETAILS | SIZE | ES | NES | NOM p-val | FDR q-val | FWER p-val | RANK AT MAX | LEADING EDGE |
| --- | --- | --- | --- | --- | --- | --- | --- | --- | --- | --- |
| HALLMARK_MYC_TARGETS_V1 | HALLMARK_MYC_TARGETS_V1 | Details ... | 194 | 0.524464 | 1.826016 | 0.02008 | 0.42848 | 0.145 | 6512 | tags=68%, list=33%, signal=101% |
| HALLMARK_MYC_TARGETS_V2 | HALLMARK_MYC_TARGETS_V2 | Details ... | 58 | 0.598541 | 1.753843 | 0.020534 | 0.330242 | 0.215 | 4745 | tags=71%, list=24%, signal=93% |
| HALLMARK_DNA_REPAIR | HALLMARK_DNA_REPAIR | Details ... | 148 | 0.455587 | 1.705442 | 0.017928 | 0.290839 | 0.272 | 8792 | tags=72%, list=45%, signal=130% |
| HALLMARK_MTORC1_SIGNALING | HALLMARK_MTORC1_SIGNALING | Details ... | 195 | 0.419227 | 1.689688 | 0.030992 | 0.243395 | 0.291 | 5868 | tags=48%, list=30%, signal=68% |
| HALLMARK_UNFOLDED_PROTEIN_RESPONSE | HALLMARK_UNFOLDED_PROTEIN_RESPONSE | Details ... | 107 | 0.443325 | 1.661447 | 0.010571 | 0.227206 | 0.331 | 5616 | tags=49%, list=28%, signal=68% |
| HALLMARK_WNT_BETA_CATENIN_SIGNALING | HALLMARK_WNT_BETA_CATENIN_SIGNALING | Details ... | 42 | 0.530616 | 1.587906 | 0.01002 | 0.281526 | 0.447 | 5765 | tags=64%, list=29%, signal=91% |
| HALLMARK_G2M_CHECKPOINT | HALLMARK_G2M_CHECKPOINT | Details ... | 189 | 0.572303 | 1.544129 | 0.062241 | 0.302071 | 0.522 | 4910 | tags=65%, list=25%, signal=85% |
| HALLMARK_GLYCOLYSIS | HALLMARK_GLYCOLYSIS | Details ... | 198 | 0.353608 | 1.533932 | 0.018634 | 0.279041 | 0.536 | 6133 | tags=47%, list=31%, signal=68% |
| HALLMARK_E2F_TARGETS | HALLMARK_E2F_TARGETS | Details ... | 195 | 0.5689 | 1.516206 | 0.102881 | 0.271423 | 0.56 | 6512 | tags=76%, list=33%, signal=112% |
| HALLMARK_UV_RESPONSE_UP | HALLMARK_UV_RESPONSE_UP | Details ... | 154 | 0.339306 | 1.49372 | 0.037657 | 0.271587 | 0.58 | 6777 | tags=44%, list=34%, signal=67% |
| HALLMARK_MITOTIC_SPINDLE | HALLMARK_MITOTIC_SPINDLE | Details ... | 198 | 0.477866 | 1.440659 | 0.087683 | 0.324286 | 0.676 | 5128 | tags=52%, list=26%, signal=70% |
| HALLMARK_PI3K_AKT_MTOR_SIGNALING | HALLMARK_PI3K_AKT_MTOR_SIGNALING | Details ... | 104 | 0.373567 | 1.412692 | 0.065041 | 0.335839 | 0.707 | 7928 | tags=56%, list=40%, signal=93% |
| HALLMARK_SPERMATOGENESIS | HALLMARK_SPERMATOGENESIS | Details ... | 133 | 0.34627 | 1.274158 | 0.129363 | 0.556551 | 0.864 | 7623 | tags=48%, list=39%, signal=78% |
| HALLMARK_P53_PATHWAY | HALLMARK_P53_PATHWAY | Details ... | 192 | 0.309189 | 1.248891 | 0.184713 | 0.568392 | 0.878 | 3560 | tags=28%, list=18%, signal=33% |
| HALLMARK_IL2_STAT5_SIGNALING | HALLMARK_IL2_STAT5_SIGNALING | Details ... | 195 | 0.339857 | 1.218346 | 0.244681 | 0.587922 | 0.9 | 5656 | tags=39%, list=29%, signal=55% |
| HALLMARK_PROTEIN_SECRETION | HALLMARK_PROTEIN_SECRETION | Details ... | 95 | 0.367119 | 1.21643 | 0.31405 | 0.55473 | 0.902 | 9687 | tags=61%, list=49%, signal=119% |
| HALLMARK_HYPOXIA | HALLMARK_HYPOXIA | Details ... | 191 | 0.303679 | 1.19514 | 0.252101 | 0.558035 | 0.91 | 5342 | tags=35%, list=27%, signal=48% |
| HALLMARK_REACTIVE_OXYGEN_SPECIES_PATHWAY | HALLMARK_REACTIVE_OXYGEN_SPECIES_PATHWAY | Details ... | 47 | 0.330971 | 1.179158 | 0.281574 | 0.555615 | 0.918 | 4457 | tags=30%, list=23%, signal=38% |
| HALLMARK_APICAL_SURFACE | HALLMARK_APICAL_SURFACE | Details ... | 43 | 0.35049 | 1.14719 | 0.286 | 0.579001 | 0.931 | 4421 | tags=33%, list=22%, signal=42% |
| HALLMARK_ESTROGEN_RESPONSE_LATE | HALLMARK_ESTROGEN_RESPONSE_LATE | Details ... | 197 | 0.267528 | 1.145502 | 0.230143 | 0.552682 | 0.931 | 5940 | tags=35%, list=30%, signal=49% |
| HALLMARK_IL6_JAK_STAT3_SIGNALING | HALLMARK_IL6_JAK_STAT3_SIGNALING |  | 87 | 0.354564 | 1.130304 | 0.332657 | 0.553059 | 0.937 | 7611 | tags=48%, list=39%, signal=78% |
| HALLMARK_APICAL_JUNCTION | HALLMARK_APICAL_JUNCTION |  | 194 | 0.290684 | 1.123418 | 0.333333 | 0.538102 | 0.939 | 9165 | tags=56%, list=46%, signal=104% |
| HALLMARK_ANDROGEN_RESPONSE | HALLMARK_ANDROGEN_RESPONSE |  | 96 | 0.283634 | 1.097574 | 0.328482 | 0.554864 | 0.949 | 4196 | tags=27%, list=21%, signal=34% |
| HALLMARK_ESTROGEN_RESPONSE_EARLY | HALLMARK_ESTROGEN_RESPONSE_EARLY | | 195 | 0.276354 | 1.095884 | 0.298283 | 0.534791 | 0.949 | 5915 | tags=34%, list=30%, signal=49% |
| HALLMARK_ALLOGRAFT_REJECTION | HALLMARK_ALLOGRAFT_REJECTION |  | 195 | 0.363072 | 1.077847 | 0.403579 | 0.537317 | 0.954 | 9865 | tags=72%, list=50%, signal=142% |
| HALLMARK_NOTCH_SIGNALING | HALLMARK_NOTCH_SIGNALING |  | 32 | 0.33069 | 1.011339 | 0.450304 | 0.620621 | 0.973 | 7591 | tags=50%, list=39%, signal=81% |
| HALLMARK_APOPTOSIS | HALLMARK_APOPTOSIS |  | 159 | 0.261103 | 1.007689 | 0.436975 | 0.603555 | 0.974 | 7844 | tags=47%, list=40%, signal=78% |
| HALLMARK_ANGIOGENESIS | HALLMARK_ANGIOGENESIS |  | 36 | 0.349611 | 1.003873 | 0.460922 | 0.588231 | 0.975 | 2552 | tags=28%, list=13%, signal=32% |
| HALLMARK_EPITHELIAL_MESENCHYMAL_TRANSITION | HALLMARK_EPITHELIAL_MESENCHYMAL_TRANSITION | | 197 | 0.319887 | 0.983916 | 0.507071 | 0.59606 | 0.982 | 6448 | tags=43%, list=33%, signal=63% |
| HALLMARK_TGF_BETA_SIGNALING | HALLMARK_TGF_BETA_SIGNALING |  | 54 | 0.319345 | 0.960657 | 0.513514 | 0.614207 | 0.986 | 7427 | tags=46%, list=38%, signal=74% |
| HALLMARK_INFLAMMATORY_RESPONSE | HALLMARK_INFLAMMATORY_RESPONSE |  | 198 | 0.284045 | 0.902655 | 0.54251 | 0.678205 | 0.988 | 8569 | tags=52%, list=43%, signal=90% |
| HALLMARK_TNFA_SIGNALING_VIA_NFKB | HALLMARK_TNFA_SIGNALING_VIA_NFKB | | 198 | 0.283048 | 0.899326 | 0.555094 | 0.661766 | 0.988 | 6558 | tags=38%, list=33%, signal=56% |
| HALLMARK_HEDGEHOG_SIGNALING | HALLMARK_HEDGEHOG_SIGNALING |  | 35 | 0.300573 | 0.890459 | 0.593617 | 0.65403 | 0.989 | 7674 | tags=54%, list=39%, signal=89% |
| HALLMARK_KRAS_SIGNALING_UP | HALLMARK_KRAS_SIGNALING_UP |  | 194 | 0.233368 | 0.845321 | 0.631365 | 0.700363 | 0.994 | 7245 | tags=41%, list=37%, signal=64% |
| HALLMARK_MYOGENESIS | HALLMARK_MYOGENESIS |  | 198 | 0.225173 | 0.840738 | 0.634694 | 0.685976 | 0.995 | 5588 | tags=27%, list=28%, signal=38% |
| HALLMARK_INTERFERON_GAMMA_RESPONSE | HALLMARK_INTERFERON_GAMMA_RESPONSE | | 198 | 0.258114 | 0.793118 | 0.640719 | 0.735977 | 0.997 | 7611 | tags=40%, list=39%, signal=65% |
| HALLMARK_COMPLEMENT | HALLMARK_COMPLEMENT |  | 200 | 0.198388 | 0.751646 | 0.730526 | 0.77535 | 0.997 | 6671 | tags=36%, list=34%, signal=54% |
| HALLMARK_HEME_METABOLISM | HALLMARK_HEME_METABOLISM |  | 192 | 0.188438 | 0.751382 | 0.825902 | 0.755489 | 0.997 | 6459 | tags=30%, list=33%, signal=44% |
| HALLMARK_UV_RESPONSE_DN | HALLMARK_UV_RESPONSE_DN |  | 138 | 0.220477 | 0.704582 | 0.78308 | 0.796025 | 0.999 | 6296 | tags=33%, list=32%, signal=48% |
| HALLMARK_INTERFERON_ALPHA_RESPONSE | HALLMARK_INTERFERON_ALPHA_RESPONSE | | 95 | 0.199036 | 0.554388 | 0.851406 | 0.925342 | 1 | 9372 | tags=41%, list=48%, signal=78% |
